# Supplementary material for: A Virtual Infection Model Quantifies Innate Effector Mechanisms and Candida albicans Immune Escape in Human Blood
Source: PubMed Central journal article supplement (PMC3930496; doi:10.1371/journal.pcbi.1003479), 2014-02-20
Supplement: pcbi.1003479.s008.pdf [file pcbi.1003479.s008.pdf]

## Supporting Table

**Table S1: Individual start conditions of the fitting algorithm.**

| $C(0)$    | $M_{0,0}(0)$ | $G_{0,0}(0)$ | number of runs | number of fitting steps | $\tau$       |
|-----------|--------------|--------------|----------------|-------------------------|--------------|
| 100       | 50           | 500          | 100            | 3 000                   | [0.05;5.0]   |
| 1 000     | 500          | 5 000        | 100            | 1 000                   | [1.0;35.0]   |
| 10 000    | 5 000        | 50 000       | 50             | 500                     | [1.0;50.0]   |
| 100 000   | 50 000       | 500 000      | 50             | 100                     | [5.0;80.0]   |
| 1 000 000 | 500 000      | 5 000 000    | 50             | 20                      | [50.0;100.0] |

Start conditions for the parameter fitting algorithm. The number of individuals of alive *C. albicans* cells in extracellular space ( $C(0)$ ), monocytes ( $M_{0,0}(0)$ ) and PMN ( $G_{0,0}(0)$ ) at time  $t = 0$  min was stepwise increased by keeping their ratio constant. For each step, the number of runs with corresponding number of fitting steps per run and the range of  $\tau$  was adjusted.
